# Supplementary material for: Association of physician burnout with perceived EHR work stress and potentially actionable factors
Source: PubMed Central journal article supplement (PMC10531111; doi:10.1093/jamia/ocad136), 2023-07-20
Supplement: ocad136_supplementary_data.pdf [file ocad136_supplementary_data.pdf]

# UC San Diego Health

## Intro screen

Thank you for your interest in participating in our study! Please take a moment to confirm the following: are you an attending physician at UC San Diego?

Yes, I am an attending physician at UCSD.

No, I am not an attending physician at UCSD.

## Consent Block

Welcome to our study of physician wellness and coping with COVID-19. Please click on the link below to access the informed consent in a new screen. You can close the consent form page to return to the survey.

**[Informed Consent](#)**

By clicking “You agree” below you are indicating that you are at least 18 years old, have read this consent form, and agree to participate in this research study.

You agree

You do not agree

## Full survey question block

Thank you for agreeing to participate. Please enter your UCSD email address below.

username@health.ucsd.edu

## Coping with COVID-19 Survey

The following questions assess the possible impact of COVID-19 on healthcare workers.

---

|  |         |        |      |           |
|--|---------|--------|------|-----------|
|  | Minimal | Modest | High | Very High |
|--|---------|--------|------|-----------|

|                                      | Minimal               | Modest                | High                  | Very High             |
|--------------------------------------|-----------------------|-----------------------|-----------------------|-----------------------|
| 1) The stress I experienced today is | <input type="radio"/> | <input type="radio"/> | <input type="radio"/> | <input type="radio"/> |

|                                                            | Not at all            | Somewhat              | Moderately            | To a Great Extent     |
|------------------------------------------------------------|-----------------------|-----------------------|-----------------------|-----------------------|
| 2) I worry about exposing myself and my family to COVID-19 | <input type="radio"/> | <input type="radio"/> | <input type="radio"/> | <input type="radio"/> |

3) Due to the impact of COVID-19, I am experiencing the following:

|                       | Not at all            | Somewhat              | Moderately            | To a Great Extent     |
|-----------------------|-----------------------|-----------------------|-----------------------|-----------------------|
| Anxiety or depression | <input type="radio"/> | <input type="radio"/> | <input type="radio"/> | <input type="radio"/> |
| Work overload         | <input type="radio"/> | <input type="radio"/> | <input type="radio"/> | <input type="radio"/> |

|                          | Not at all            | Somewhat              | Moderately            | To a Great Extent     |
|--------------------------|-----------------------|-----------------------|-----------------------|-----------------------|
| Concerns about childcare | <input type="radio"/> | <input type="radio"/> | <input type="radio"/> | <input type="radio"/> |

If you are feeling severe distress, please contact the UC San Diego Health Healer Education Assessment and Referral Program (HEAR) at [hear.ucsd.edu](http://hear.ucsd.edu) or 858-657-6795, local mental resource, or the national suicide prevention helpline at 1-800-273-8255.

4) How would the following improve your ability to sustain through the COVID-19 crisis?

|                                      | Not at all            | Somewhat              | Moderately            | To a Great Extent     |
|--------------------------------------|-----------------------|-----------------------|-----------------------|-----------------------|
| Staff or colleague support for inbox | <input type="radio"/> | <input type="radio"/> | <input type="radio"/> | <input type="radio"/> |
| Healthy food available at all hours  | <input type="radio"/> | <input type="radio"/> | <input type="radio"/> | <input type="radio"/> |

|                                       | Not at all            | Somewhat              | Moderately            | To a Great Extent     |
|---------------------------------------|-----------------------|-----------------------|-----------------------|-----------------------|
| Personal access to mental health care | <input type="radio"/> | <input type="radio"/> | <input type="radio"/> | <input type="radio"/> |

|                                                                                       | Not at all            | Somewhat              | Moderately            | To a Great Extent     |
|---------------------------------------------------------------------------------------|-----------------------|-----------------------|-----------------------|-----------------------|
| 5) Being part of the COVID-19 response has increased my sense of meaning and purpose. | <input type="radio"/> | <input type="radio"/> | <input type="radio"/> | <input type="radio"/> |

|  | Not at all | Somewhat | Moderately | To a Great Extent |
|--|------------|----------|------------|-------------------|
|--|------------|----------|------------|-------------------|

|                                      | Not at all            | Somewhat              | Moderately            | To a Great Extent     |
|--------------------------------------|-----------------------|-----------------------|-----------------------|-----------------------|
| 6) I feel valued by my organization. | <input type="radio"/> | <input type="radio"/> | <input type="radio"/> | <input type="radio"/> |

7) What else would you like to tell us about your experience during the COVID-19 crisis?

(Note: anonymous and aggregate responses may be shared with UC San Diego Health's leadership team to inform decision-making.)

## Physician Wellness Survey

Please think about your work in general, and answer the following questions.

|                                                 | Agree strongly        | Agree                 | Neither agree nor disagree | Disagree              | Strongly disagree     |
|-------------------------------------------------|-----------------------|-----------------------|----------------------------|-----------------------|-----------------------|
| 8) Overall, I am satisfied with my current job. | <input type="radio"/> | <input type="radio"/> | <input type="radio"/>      | <input type="radio"/> | <input type="radio"/> |

9) Using your own definition of “burnout,” please choose one of the numbers below\*

5 = I enjoy my work. I have no symptoms of burnout.

4

3 = I am beginning to burn out and have one or more symptoms of burnout, e.g. emotional exhaustion.

2

1 = I feel completely burned out. I am at the point where I may need to seek help.

\*If you select 1 or 2, please consider seeking assistance – call your healthcare provider or UCSD's [HEAR](#) program.

|                                                                                | Agree strongly | Agree | Neither agree nor disagree | Disagree | Strongly disagree |
|--------------------------------------------------------------------------------|----------------|-------|----------------------------|----------|-------------------|
| 10) My professional values are well aligned with those of my clinical leaders. | ○              | ○     | ○                          | ○        | ○                 |

|                                                                    | Poor | Marginal | Satisfactory | Good | Optimal |
|--------------------------------------------------------------------|------|----------|--------------|------|---------|
| 11) The degree to which my care team works efficiently together is | ○    | ○        | ○            | ○    | ○       |



|                                           | Poor                  | Marginal              | Satisfactory          | Good                  | Optimal               |
|-------------------------------------------|-----------------------|-----------------------|-----------------------|-----------------------|-----------------------|
| 12) My control over my <u>workload</u> is | <input type="radio"/> | <input type="radio"/> | <input type="radio"/> | <input type="radio"/> | <input type="radio"/> |

|                                                      | Agree strongly        | Agree                 | Neither agree nor disagree | Disagree              | Strongly disagree     |
|------------------------------------------------------|-----------------------|-----------------------|----------------------------|-----------------------|-----------------------|
| 13) I feel a great deal of stress because of my job. | <input type="radio"/> | <input type="radio"/> | <input type="radio"/>      | <input type="radio"/> | <input type="radio"/> |

| Excessive | Moderately high | Satisfactory | Modest | Minim |
|-----------|-----------------|--------------|--------|-------|
|-----------|-----------------|--------------|--------|-------|

|                                                    | Excessive             | Moderately high       | Satisfactory          | Modest                | Minim                 |
|----------------------------------------------------|-----------------------|-----------------------|-----------------------|-----------------------|-----------------------|
| 14) The amount of time I spend on documentation is | <input type="radio"/> | <input type="radio"/> | <input type="radio"/> | <input type="radio"/> | <input type="radio"/> |

|                                                                                         | Excessive             | Moderately high       | Satisfactory          | Modest                | Minimal/noi           |
|-----------------------------------------------------------------------------------------|-----------------------|-----------------------|-----------------------|-----------------------|-----------------------|
| 15) The amount of time I spend on the electronic medical record (EMR) <i>at home</i> is | <input type="radio"/> | <input type="radio"/> | <input type="radio"/> | <input type="radio"/> | <input type="radio"/> |

| | Moderately | |

|                                                                       | Excessive             | high<br>Moderately    | Satisfactory          | Modest                | Minimal/no            |
|-----------------------------------------------------------------------|-----------------------|-----------------------|-----------------------|-----------------------|-----------------------|
| 16) The amount of frustration I experience with the EMR during my day | Excessive             | high                  | Satisfactory          | Modest                | Minimal/no            |
|                                                                       | <input type="radio"/> | <input type="radio"/> | <input type="radio"/> | <input type="radio"/> | <input type="radio"/> |

17) Which number best describes the atmosphere in your primary work area?

5 = Calm

4

3 = Busy, but reasonable

2

1 = Hectic, chaotic

|                   |          |                            |       |                |
|-------------------|----------|----------------------------|-------|----------------|
| Strongly disagree | Disagree | Neither agree nor disagree | Agree | Agree strongly |
|-------------------|----------|----------------------------|-------|----------------|

|                                                         | Strongly disagree     | Disagree              | Neither agree nor disagree | Agree                 | Agree strongly        |
|---------------------------------------------------------|-----------------------|-----------------------|----------------------------|-----------------------|-----------------------|
| 18) I am likely to reduce my FTE in the next 12 months. | <input type="radio"/> | <input type="radio"/> | <input type="radio"/>      | <input type="radio"/> | <input type="radio"/> |

19) How true is the following statement about conditions in your principal practice site?

|                               | Not at all true       | Somewhat true         | Moderately true       | Very true             | Completely true       |
|-------------------------------|-----------------------|-----------------------|-----------------------|-----------------------|-----------------------|
| Physicians are highly valued. | <input type="radio"/> | <input type="radio"/> | <input type="radio"/> | <input type="radio"/> | <input type="radio"/> |

20) In the past 2 weeks,

How many hours of sleep did you get each night?

How many days/week did you exercise for 30 cumulative minutes or more?

How many days/week did you practice mindfulness (e.g. meditation, breathing exercises, gratitude practice)?

## Demographic Information

Please respond to the following demographic questions.

21) Please specify your gender.

Male

Female

Non-binary/Third gender

Prefer not to answer

22) What is your race?

Black or African American

Asian

Native American

White

Native Hawaiian or other Pacific Islander

Prefer not to answer

### 23) What is your ethnicity?

Latino/Hispanic

Not Latino/Hispanic

Prefer not to answer

### 24) Overall, do you consider yourself to work

Full-time

Part-time

### 25) Please indicate your percentages of clinical and administrative FTE below.

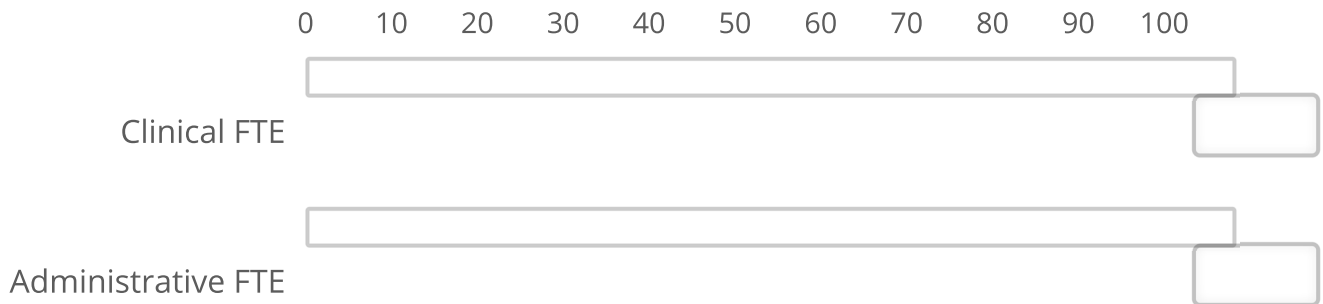

26) In what type of setting do you spend the majority of your clinical time?

27) How many years after training have you been in practice?

1-5 years

6-10 years

11-15 years

16-20 years

More than 20 years

28) Please indicate the Department of your primary appointment at UC San Diego School of Medicine.

29) Please select your Division in the Department of Medicine.

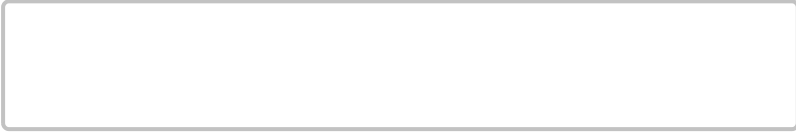

Powered by Qualtrics
